# Supplementary material for: A fungal substrate mimicking molecule suppresses plant immunity via an inter-kingdom conserved motif
Source: PubMed Central journal article supplement (PMC6450895; doi:10.1038/s41467-019-09472-8), 2019-04-05
Supplement: 41467_2019_9472_MOESM3_ESM.pdf [file 41467_2019_9472_MOESM3_ESM.pdf]

## **Description of Additional Supplementary Files**

File Name: Supplementary Data 1

Description: TOP15 proteases found in F-24 by MS analysis

File Name: Supplementary Data 2

Description: Signal peptide prediction for cMIP-containing sequences described in Figure 7

File Name: Supplementary Data 3

Description: Strains used in this study

File Name: Supplementary Data 4

Description: Primers used in this study
