# Supplementary material for: A fungal substrate mimicking molecule suppresses plant immunity via an inter-kingdom conserved motif
Source: PubMed Central journal article supplement (PMC6450895; doi:10.1038/s41467-019-09472-8), 2019-04-05
Supplement: 41467_2019_9472_MOESM4_ESM.pdf [file 41467_2019_9472_MOESM4_ESM.pdf]

**Table S1. TOP15 proteases found in F-24 by MS analysis**

| TOP 15 | UniProt ID        | Description                                                              | Uniq. pept. |
|--------|-------------------|--------------------------------------------------------------------------|-------------|
| 1      | C0P8L3            | Carboxypeptidase                                                         | 12          |
| 2      | <b>A0A1D6JG12</b> | <b>Cysteine protease 1, CP1B</b>                                         | <b>7</b>    |
| 3      | <b>A0A1D6DW35</b> | <b>Insect resistance 3, CP1A</b>                                         | <b>4</b>    |
| 4      | C0P7P2            | Carboxypeptidase                                                         | 4           |
| 5      | A0A1D6KWW2        | Subtilisin-like protease                                                 | 13          |
| 6      | <b>Q10717</b>     | <b>Cysteine proteinase 2, CP2</b>                                        | <b>3</b>    |
| 7      | A0A1D6F2R4        | Carboxypeptidase                                                         | 4           |
| 8      | <b>B6TIC7</b>     | <b>Cysteine protease 5, XCP2</b>                                         | <b>5</b>    |
| 9      | <b>B4F9F5</b>     | <b>SPG31-like peptidase; Senescence-specific cysteine protease SAG12</b> | 2           |
| 10     | B6SYG2            | Carboxypeptidase; Serine carboxypeptidase-like 51                        | 4           |
| 11     | B6TXF8            | Serine carboxypeptidase 1                                                | 2           |
| 12     | A0A1D6FPN2        | Putative subtilase family protein                                        | 3           |
| 13     | A0A1D6HP95        | Carboxyl-terminal-processing peptidase 2 chloroplastic                   | 4           |
| 14     | <b>A0A1D6GGX8</b> | <b>Cysteine protease 1, SPG31-like peptidase</b>                         | 2           |
| 15     | <b>B4FZ79</b>     | <b>Senescence-specific cysteine protease SAG12</b>                       | 2           |

\*PLCPs are labelled red. PLCPs previously found in van der Linde et al (2012a) are shown in bold.
