# Supplementary material for: A fungal substrate mimicking molecule suppresses plant immunity via an inter-kingdom conserved motif
Source: PubMed Central journal article supplement (PMC6450895; doi:10.1038/s41467-019-09472-8), 2019-04-05
Supplement: 41467_2019_9472_MOESM5_ESM.pdf [file 41467_2019_9472_MOESM5_ESM.pdf]

Table S2. Signal peptide prediction for cMIP-containing sequences described in Figure 7

| Species name                         | Classification           | Sequence name | length | SignalP 2.0 Results |                            |               |                       |                            |               |                       |                            |               | TM-HMM 2.0 Results |         |         |                                                                    | TargetP 1.1 Results |                |       |              |                   |               |
|--------------------------------------|--------------------------|---------------|--------|---------------------|----------------------------|---------------|-----------------------|----------------------------|---------------|-----------------------|----------------------------|---------------|--------------------|---------|---------|--------------------------------------------------------------------|---------------------|----------------|-------|--------------|-------------------|---------------|
|                                      |                          |               |        | For Eukaryotes      |                            |               | For Gram -ve bacteria |                            |               | For Gram +ve bacteria |                            |               | ExpAA              | First60 | PredHel | Topology                                                           | mTP probability     | SP probability | other | Localisation | Reliability Class | Signal length |
|                                      |                          |               |        | Secreted?           | Signal peptide probability | Cleavage site | Secreted?             | Signal peptide probability | Cleavage site | Secreted?             | Signal peptide probability | Cleavage site |                    |         |         |                                                                    |                     |                |       |              |                   |               |
| <i>Amycolatopsis mediterranei</i>    | Gram+ bacterium          | Amed          | 197    | No                  | 0.007                      | 0             | No                    | 0                          | 0             | No                    | 0.006                      | 0             | 62.14              | 0       | 3       | i115-137o142-164i177-196o                                          | 0.092               | 0.063          | 0.879 | -            | 2                 | -             |
| <i>Burkholderia vietnamiensis</i> G4 | Gram- bacterium          | Bviet         | 604    | No                  | 0.042                      | 0             | No                    | 0.003                      | 0             | No                    | 0.001                      | 21            | 4.03               | 1.52    | 0       | o                                                                  | 0.449               | 0.194          | 0.244 | M            | 4                 | 53            |
| <i>Microbacterium</i>                | Gram+ bacterium          | Micrbo        | 195    | No                  | 0.004                      | 57            | No                    | 0                          | 66            | No                    | 0.03                       | 66            | 96.39              | 20.89   | 4       | o40-62i75-97o117-151i158-180o                                      | 0.109               | 0.348          | 0.673 | -            | 4                 | -             |
| <i>Streptomyces</i> sp               | Gram+ bacterium          | Strep         | 140    | No                  | 0                          | 68            | No                    | 0                          | 0             | No                    | 0                          | 0             | 61.05              | 2.47    | 3       | i58-80o85-107i120-139o                                             | 0.049               | 0.245          | 0.889 | -            | 2                 | -             |
| <i>Micobacterium</i>                 | Gram+ bacterium          | Mycob         | 294    | No                  | 0.864                      | 25            | No                    | 0.868                      | 69            | No                    | 0.38                       | 27            | 183.52             | 26.1    | 9       | o4-21i52-70o75-97i104-126o136-158i165-182o192-214i226-248o258-277i | 0.018               | 0.926          | 0.116 | S            | 1                 | 94            |
| <i>Pseudozyma antarctica</i>         | Ustilaginomycetous yeast | Pant          | 137    | No                  | 0.982                      | 51            | No                    | 0.737                      | 52            | No                    | 0.486                      | 52            | 21.63              | 21.63   | 1       | o28-50i                                                            | 0.494               | 0.169          | 0.374 | M            | 5                 | 114           |
| <i>Pseudozyma hubeiensis</i>         | Ustilaginomycetous yeast | Phub          | 150    | No                  | 0                          | 0             | No                    | 0                          | 66            | No                    | 0                          | 66            | 0                  | 0       | 0       | o                                                                  | 0.236               | 0.048          | 0.796 | -            | 3                 | -             |
| <i>Sporisorium reilianum</i>         | Smut fungus              | Srei          | 117    | YES                 | 0.999                      | 23            | YES                   | 0.998                      | 23            | YES                   | 0.966                      | 23            | 17.15              | 17.15   | 1       | i7-24o                                                             | 0.201               | 0.942          | 0.007 | S            | 2                 | 23            |
| <i>Ustilago hordei</i>               | Smut fungus              | Uhor          | 120    | YES                 | 0.983                      | 24            | No                    | 0.861                      | 17            | No                    | 0.773                      | 22            | 2.94               | 2.94    | 0       | o                                                                  | 0.389               | 0.819          | 0.009 | S            | 3                 | 24            |
| <i>Ustilago maydis</i>               | Smut fungus              | Umay          | 118    | YES                 | 0.999                      | 25            | YES                   | 0.999                      | 17            | YES                   | 1                          | 25            | 15.48              | 15.48   | 0       | o                                                                  | 0.178               | 0.843          | 0.011 | S            | 2                 | 25            |
| <i>Melanopsichium pennsylvanicum</i> | Smut fungus              | Mpen          | 109    | YES                 | 1                          | 24            | YES                   | 1                          | 24            | YES                   | 1                          | 24            | 4.95               | 4.95    | 0       | o                                                                  | 0.239               | 0.879          | 0.011 | S            | 2                 | 24            |

ExpAA = The expected number of amino acids intramembrane helices. If this number is larger than 18 it is very likely to be a transmembrane protein

First60 = The expected number of amino acids in transmembrane helices in the first 60 amino acids of the protein. If this number more than a few, you should be warned that a predicted transmembrane helix in the N-term could be a signal peptide.

PredHel = The number of predicted transmembrane helices.

Topology = The topology is given as the position of the transmembrane helices separated by 'i' if the loop is on the inside or 'o' if it is on the outside. The above example 'i7-29o44-66i87-109o' means that it starts on the inside, has a predicted TMH at position 7 to 29, the outside, then a TMH at position 44-66 etc.

- |                 |                                      |                          |                                   |
|-----------------|--------------------------------------|--------------------------|-----------------------------------|
| 1. Amed_Pit2    | <i>Amycolatopsis mediterranei</i>    | Bacterium                | Gram-positive produces Rifampicin |
| 2. Microbo_Pit2 | <i>Microbacterium</i> sp. 292MF      | Bacterium                | Gram-positive Actinobacteria      |
| 3. Mycob_Pit2   | <i>Micobacterium tusciae</i>         | Bacterium                | Gram positive                     |
| 4. Strep_Pit2   | <i>Streptomyces</i> sp               | Bacterium                | Gram-positive Actinobacteria      |
| 5. Bviet_Pit2   | <i>Burkholderia vietnamiensis</i> G4 | Bacterium                | Gram-negative, Proteobacteria     |
| 6. Mpen_Pit2    | <i>Melanopsichium pennsylvanicu</i>  | Smut Fungus              |                                   |
| 7. Umay_Pit     | <i>Ustilago maydis</i>               | Smut Fungus              |                                   |
| 8. Pant_Pit2    | <i>Pseudozyma antarctica</i>         | Ustilaginomycetous yeast | produces lipids                   |
| 9. Phub_Pit2    | <i>Pseudozyma hubeiensis</i>         | Ustilaginomycetous yeast | produces lipids                   |
| 10. Srei_Pit2   | <i>Sporisorium reilianum</i>         | Smut Fungus              | causes disease on Sorghum         |
| 11. Uhor_Pit2   | <i>Ustilago hordei</i>               | Smut Fungus              | causes barley Covered smut        |
