# Supplementary material for: A fungal substrate mimicking molecule suppresses plant immunity via an inter-kingdom conserved motif
Source: PubMed Central journal article supplement (PMC6450895; doi:10.1038/s41467-019-09472-8), 2019-04-05
Supplement: 41467_2019_9472_MOESM6_ESM.pdf [file 41467_2019_9472_MOESM6_ESM.pdf]

**Table S3. Strains used in this study**

| strains used                    |                                                                 | Phleomycin (P), Hygromycin (H), Carboxin (C), Carbenicillin (Carb), Rifampicin (R), Gentamicin (G) |                         |                                      |
|---------------------------------|-----------------------------------------------------------------|----------------------------------------------------------------------------------------------------|-------------------------|--------------------------------------|
| strain                          | genotype                                                        | resistance                                                                                         | reference               | comments                             |
| SG200                           | a1mfa2bW2 bE1                                                   | P                                                                                                  | Kamper et al., 2006     |                                      |
| SG200Δpit2                      | a1mfa bW2bE1 Δum01375::hph                                      | P, H                                                                                               | Doehlemann et al., 2011 |                                      |
| SG200Δpit2-UhPit2               | a1mfa2 bW2bE1 Δum01375::hph ipr[Ppit2::uh02064]jps              | P, H, C                                                                                            | this work               | without introns                      |
| SG200Δpit2-SrPit2               | a1mfa2 bW2bE1 Δum01375::hph ipr[Ppit2::sr10529]jps              | P, H, C                                                                                            | this work               | without introns                      |
| SG200Δpit2-MpPit2               | a1mfa2 bW2bE1 Δum01375::hph ipr[Ppit2::mp4_3204_1]jps           | P, H, C                                                                                            | this work               | without introns                      |
| SG200Δpit2-UmPID14              | a1mfa2 bW2bE1 Δum01375::hph ipr[Ppit2-UmPID14]jps               | P, H, C                                                                                            | this work               | without introns                      |
| SG200Δpit2-UhPID14              | a1mfa2 bW2bE1 Δum01375::hph ipr[Ppit2-UhPID14]jps               | P, H, C                                                                                            | this work               | without introns                      |
| SG200Δpit2-UmPit2-UhPID14       | a1mfa2 bW2bE1 Δum01375::hph ipr[Ppit2::um01375UhPID14]jps       | P, H, C                                                                                            | this work               | without introns                      |
| SG200Δpit2-UhPit2-UmPID14       | a1mfa2 bW2bE1 Δum01375::hph ipr[Ppit2::uh02064UmPID14]jps       | P, H, C                                                                                            | this work               | without introns                      |
| SG200Δpit2-UmPit2               | a1mfa2 bW2bE1 Δum01375::hph ipr[Ppit2::um01375]jps              | P, H, C                                                                                            | this work               | without introns                      |
| SG200Δpit2-UmPit2_RW mut        | a1mfa2 bW2bE1 Δum01375::hph ipr[Ppit2::um01375 R51AW52A mut]jps | P, H, C                                                                                            | this work               | without introns                      |
| SG200-UmPit2-mCherry-HA         | a1mfa2bW2 bE1 SG200 ipr[Ppit2::um01375-mCherry-HA]jps           | P, C                                                                                               | this work               |                                      |
| SG200-SP-mCherry-HA             | a1mfa2bW2 bE1 SG200 ipr[Ppit2::Pit2SP-mCherry-HA]jps            | P, C                                                                                               | this work               |                                      |
| SG200-mCherry                   | a1mfa2bW2 bE1 SG200 ipr[Ppit2::mcherry]jps                      | P, C                                                                                               | this work               |                                      |
| SG200-UhPit2-mCherry-HA         | a1mfa2 bW2bE1 SG200 ipr[Ppit2::uh02064-mCherry-HA]jps           | P, C                                                                                               | this work               | without introns                      |
| SG200-SrPit2-mCherry-HA         | a1mfa2 bW2bE1 SG200 ipr[Ppit2::sr10529-mCherry-HA]jps           | P, C                                                                                               | this work               | without introns                      |
| SG200-MpPit2-mCherry-HA         | a1mfa2 bW2bE1 SG200 ipr[Ppit2::mp4_3204_1-mCherry-HA]jps        | P, C                                                                                               | this work               | without introns                      |
| SG200-UmPit2-UhPID14-mCherry-HA | a1mfa2bW2 bE1 SG200 ipr[Ppit2::um01375UhPID14-mCherry-HA]jps    | P, C                                                                                               | this work               | without introns                      |
| SG200-UhPit2-UmPID14-mCherry-HA | a1mfa2bW2 bE1 SG200 ipr[Ppit2::uh02064UmPID14-mCherry-HA]jps    | P, C                                                                                               | this work               | without introns                      |
| SG200-UmPID14-mCherry           | a1mfa2bW2 bE1 SG200 ipr[Ppit2-UmPID14-mcherry]jps               | P, C                                                                                               | this work               |                                      |
| SG200-UhPID14-mCherry           | a1mfa2bW2 bE1 SG200 ipr[Ppit2-UhPID14-mcherry]jps               | P, C                                                                                               | this work               |                                      |
| SG200-UmPit2_RW mut-mCherry     | a1mfa2bW2 bE1 SG200 ipr[Ppit2::um01375 R51AW52A mut-mCherry]jps | P, C                                                                                               | this work               | without introns                      |
| GV3101_CP1a                     | pL1M-F1-CP1A_nogran-Streptwin::2x35S                            | Carb, R, G                                                                                         | this work               | for <i>N. benthamiana</i> expression |
| GV3101_CP2                      | pL1M-F1-CP2-Streptwin::2x35S                                    | Carb, R, G                                                                                         | this work               | for <i>N. benthamiana</i> expression |
| GV3101_p19                      | pL1M-F3_p19::2x35S                                              | Carb, R, G                                                                                         | this work               | for <i>N. benthamiana</i> expression |
