# Supplementary material for: A fungal substrate mimicking molecule suppresses plant immunity via an inter-kingdom conserved motif
Source: PubMed Central journal article supplement (PMC6450895; doi:10.1038/s41467-019-09472-8), 2019-04-05
Supplement: 41467_2019_9472_MOESM7_ESM.pdf [file 41467_2019_9472_MOESM7_ESM.pdf]

Table S4. Primers used in this study

| primers used           |                                                                                                     |                                                    |
|------------------------|-----------------------------------------------------------------------------------------------------|----------------------------------------------------|
| name                   | sequence 5' - 3'                                                                                    | use                                                |
| Tnos_fw                | ATACCCGGGCGGCCGCTAGCTCTAGAGCCGCCGGCTGCAGATCGT                                                       | assembly of p123_Ppit2                             |
| Pit2_SP_fw             | ATACCGCGGATGCTGTTTCGCTCAGCCTTTGTTCTGCTCATCGTGGCCTTTGCAAGTGCATGCCTGGTGAACATGTTCAAGCTATTCCGCCGGGATA   | cloning of Um01375 signal peptide                  |
| Pit2_SP_rv             | TATCCCGGGCGGAATAGCTTGAACATGTTGCACCAGGCATGCACCTTGCAAAGGCCACGATGAGCAGAACAAGGCTGAGCGAAACAGCATCCGCGGTAT | cloning of Um01375 signal peptide                  |
| UmPit2_Xma_fw          | ATACCCGGGATTCGGTGCGTCGATCGCTC                                                                       | amplification of Um01375 without signal peptide    |
| UmPit2_Xba_rv          | GCGTCTAGATTATCCAGATGACCACATCTCCG                                                                    | amplification of Um01375 without signal peptide    |
| UhPit2_Xma_fw          | TGTCCCGGGAACAGACCTTTACGCAGAGC                                                                       | amplification of Uh02064 without signal peptide    |
| UhPit2_Xba_rv          | CACTCTAGACTAAGACTTCTTGCTGCTGC                                                                       | amplification of Uh02064 without signal peptide    |
| SrPit2_Xma_fw          | TATCCCGGGATGCCAGCCATGCGTCGATC                                                                       | amplification of sr10529 without signal peptide    |
| SrPit2_Xba_rv          | CACTCTAGATCAGTGGCTCTGTACCCAA                                                                        | amplification of sr10529 without signal peptide    |
| MpPit2_Xma_fw          | TATCCCGGGGCGCAATCCAAGCTGTACC                                                                        | amplification of mp4_3204_1 without signal peptide |
| MpPit2_Xba_rv1         | TGTTCTAGATTACTGCGAAAAAGTGACCC                                                                       | amplification of mp4_3204_1 without signal peptide |
| UHPID14_fw             | AGAGCCCGGATGAAGCTCCACCGACGATGGTACTTTCTGCCCCGGCTCACTTTAATCTAGAATAT                                   | cloning of UHPID14                                 |
| UHPID14_rv             | ATATTCTAGATTAAGTGAGCCGGGCCAGAGAAAGTACCATCGTCGGTGGAGCTTCATCCCGGGCTCT                                 | cloning of UHPID14                                 |
| UmPID14_fw             | AGAGCCCGGATGAAGCTCAACCGGAGATGGTGGTTCGGCTTCACAGGTTGCTCTAATCTAGAATAT                                  | cloning of UmPID14                                 |
| UmPID14rv1             | ATATTCTAGATTAGAGCGAACCTGTGAAGCCGAACCACCATCTCCGGTTGAGCTTCATCCCGGGCTCT                                | cloning of UmPID14                                 |
| UmPit2-UHPID14_fw      | AAGTCCACCGACGATGGTACTTTCTGCCCCGGCTCACTGGCAAGGAACCTGACAACGGCCAAGTACAG                                | insertion of UHPID14 into Um01375                  |
| UmPit2-UHPID14_rv      | AAGTGAGCCGGGCCAGAGAAAGTACCATCGTCGGTGGAGCTTGCCAGCAGCCGAGCTCATTGAGGCATCGG                             | insertion of UHPID14 into Um01375                  |
| UhPit2-UmPID14_fw      | AAGTCAACCGGAGATGGTGGTTCGGCTTCACAGGTTGCTCGCTCCCAAACCTCCACGTGA                                        | insertion of UmPID14 into Uh02064                  |
| UhPit2-UmPID14_rv      | GAGCGAACCTGTGAAGCCGAACCACCATCTCCGGTTGAGCTTGGTGTATTAATTGTCGTTGT                                      | insertion of UmPID14 into Uh02064                  |
| UmPit2_RW_mut          | GGCAAGCTCAACCGGGGAGGGTGGTTCGGCTTCACAGG                                                              | Um01375 site directed mutagenesis R48G-W49G        |
| CP1A-F-Bsal            | GGTCTCAAATGGCTGCCTCCACCACG                                                                          | For direct cloning into pICH47732 binary vector    |
| CP1A_nogranulin_R_Bsal | GGTCTCACGAACCGTTAGCGCCCTCCTTCAA                                                                     | For direct cloning into pICH47732 binary vector    |
| CP2-F-Bsal             | GGTCTCAAATGGCCCAACGCGCCTG                                                                           | For direct cloning into pICH47732 binary vector    |
| CP2-R-Bsal             | GGTCTCACGAACCTGCGACAATAGGGTAGGA                                                                     | For direct cloning into pICH47732 binary vector    |
